# Supplementary material for: Superamphiphobic aluminum surfaces that maintain robust stability after undergoing severe chemical and physical damage
Source: Royal Society of Chemistry journal article supplement (doi:10.1039/c6nj03696a), 2017-01-01
Supplement: c6nj03696a1.pdf [file c6nj03696a1.pdf]

## Electronic Supplementary Information

### **Superamphiphobic aluminum surfaces that maintain robust stability after undergoing severe chemical and physical damages**

Jiaqi Chen<sup>1</sup>, Mengying Long<sup>1</sup>, Shan Peng\*, Xiaojun Yang, and Wenli Deng\*

*College of Materials Science and Engineering, South China University of Technology,  
Guangzhou 510640, P. R. China*

Wushan Road, Tianhe District, Guangzhou 510640, P.R. China.

Tel: (+86)020-22236708

E-mail: pengshan5213@163.com

wldeng@scut.edu.cn

Journal: New Journal of Chemistry

<sup>1</sup> These authors contributed equally to this work.

**Table S1**

Atomic concentration of various surfaces

| Treatment/composition (atom%) | C     | O     | F     | Al    | Si   |
|-------------------------------|-------|-------|-------|-------|------|
| NP surface                    | /     | 60.77 | /     | 39.23 | /    |
| MS surface                    | /     | 7.05  | /     | 92.95 | /    |
| H-NP-0 surface                | /     | 59.57 | /     | 40.43 | /    |
| H-NP-12 surface               | /     | 61.32 | /     | 38.68 | /    |
| H-NW-16 surface               | /     | 60.56 | /     | 39.44 | /    |
| PDES modified H-NW-16 surface | 12.20 | 44.96 | 10.91 | 29.20 | 2.73 |

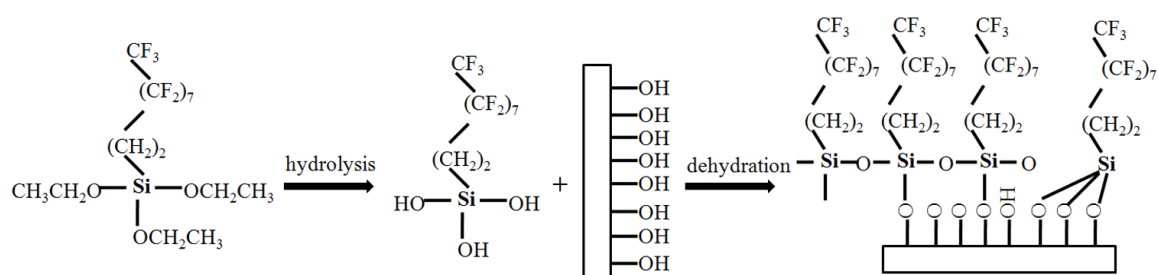**Fig. S1.** The self-assembly processes of the PDES layer on the as-prepared surface.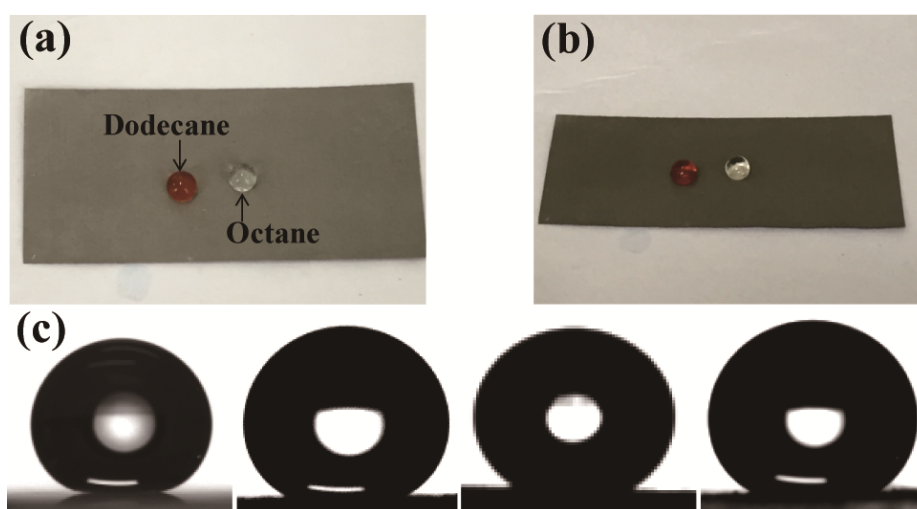**Fig. S2.** The top-view (a) and side-view (b) photographs of the dodecane, and octane drops on the superamphiphobic H-NW-16 surfaces. (c) CA shapes of the water, hexadecane, dodecane and octane drops on the surface.

**Table S2**

Contact angles and sliding angles of various liquids when positioned onto H-NW-16 and H-NP-12 surfaces

| Liquid                  | Surface tension/<br>$\text{mN m}^{-1}$ (20 °C) | H-NW-16 surface<br>with coating |            | H-NP-12 surface<br>with coating |            |
|-------------------------|------------------------------------------------|---------------------------------|------------|---------------------------------|------------|
|                         |                                                | CA (°)                          | SA (°)     | CA (°)                          | SA (°)     |
| Water                   | 72                                             | $169 \pm 2$                     | $\sim 0$   | $169 \pm 2$                     | $\sim 0$   |
| Glycerol                | 50                                             | $160 \pm 2$                     | $2 \pm 1$  | $159 \pm 2$                     | $4 \pm 1$  |
| Ethylene Glycol         | 48                                             | $157 \pm 2$                     | $3 \pm 2$  | $157 \pm 2$                     | $4 \pm 1$  |
| $\text{CH}_2\text{I}_2$ | 46                                             | $156 \pm 2$                     | $3 \pm 1$  | $155 \pm 2$                     | $6 \pm 2$  |
| Rapeseed oil            | 35                                             | $154 \pm 2$                     | $4 \pm 1$  | $152 \pm 1$                     | $8 \pm 2$  |
| Hexadecane              | 27                                             | $154 \pm 2$                     | $4 \pm 1$  | $152 \pm 2$                     | $22 \pm 1$ |
| Dodecane                | 25                                             | $152 \pm 2$                     | $6 \pm 1$  | $150 \pm 1$                     | $30 \pm 2$ |
| Octane                  | 21                                             | $151 \pm 2$                     | $12 \pm 1$ | $148 \pm 2$                     | N/A        |

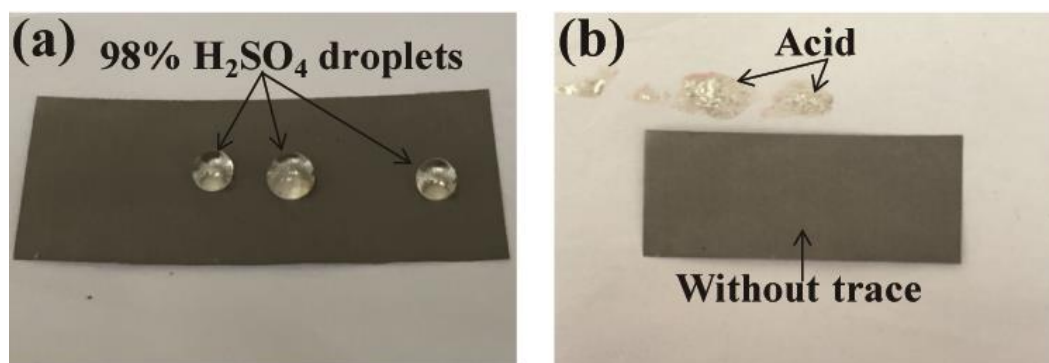

**Fig. S3.** The superamphiphobic H-NW-16 surfaces could repel 98% concentrated sulfur acid drops without trace.

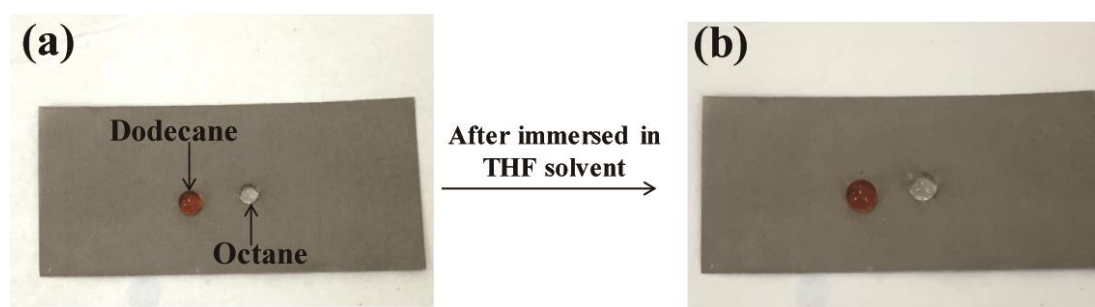

**Fig. S4.** The superamphiphobic surfaces kept its super-liquid-repellency without change after immersed into THF solvent.

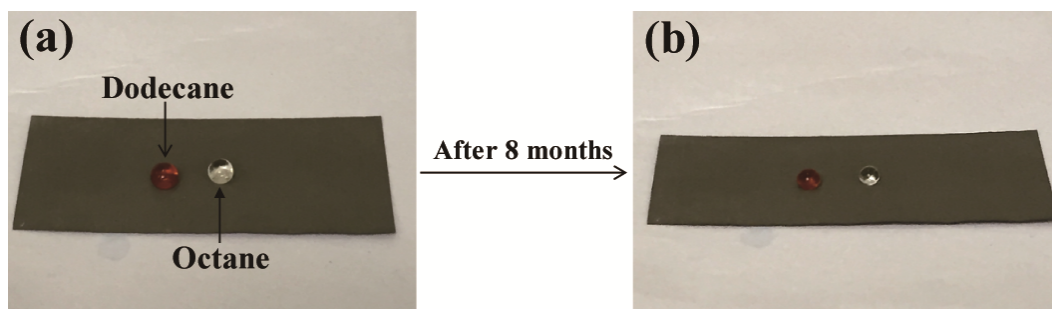

**Fig. S5.** The superamphiphobic surfaces maintained no change for dodecane and octane drops before and after air-stored for 8 months.

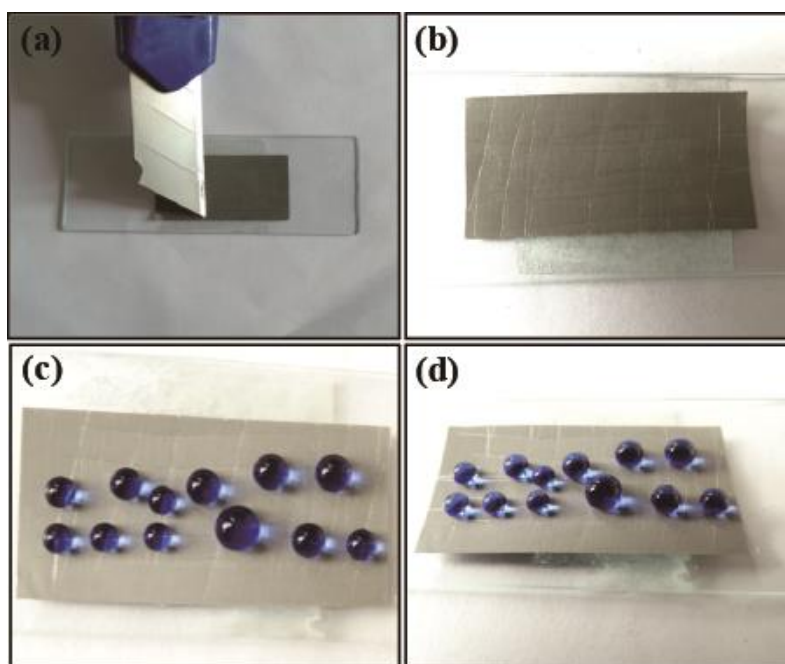

**Fig. S6.** The superamphiphobic H-NW-16 surfaces still maintained excellent super-water-repellency after being scratched for many times by a sharp blade.

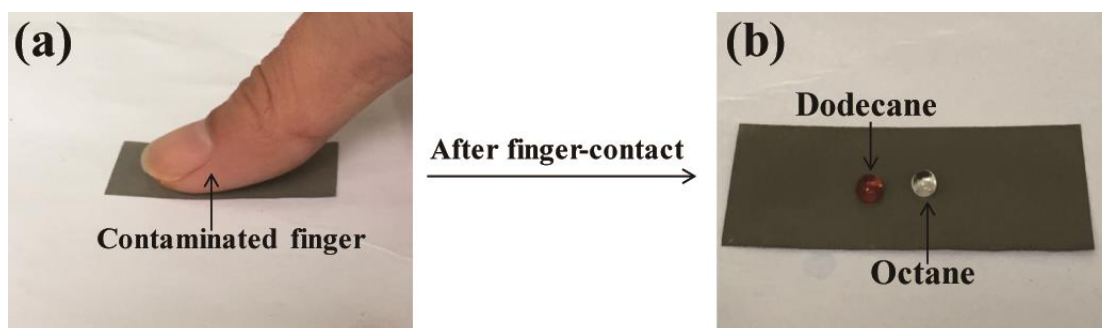

**Fig. S7.** The superamphiphobic surfaces still maintained superamphiphobicity for dodecane and octane after being contacted by a contaminated hand.

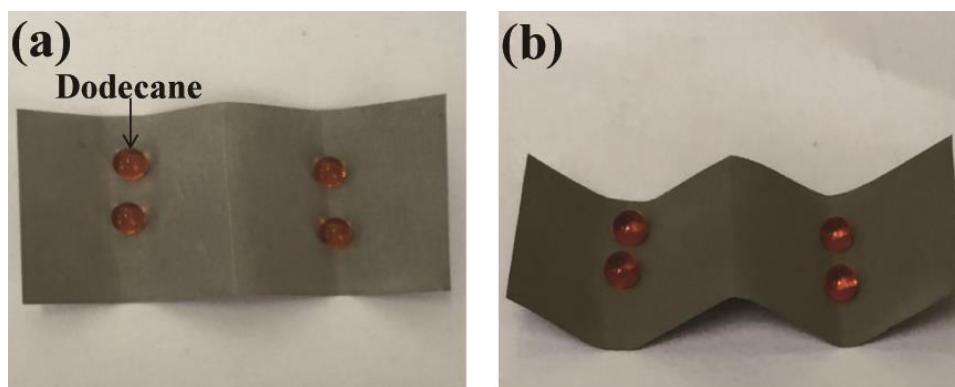

**Fig. S8.** The superamphiphobic surfaces presented excellent bendable property without changing superoleophobicity toward dodecane.

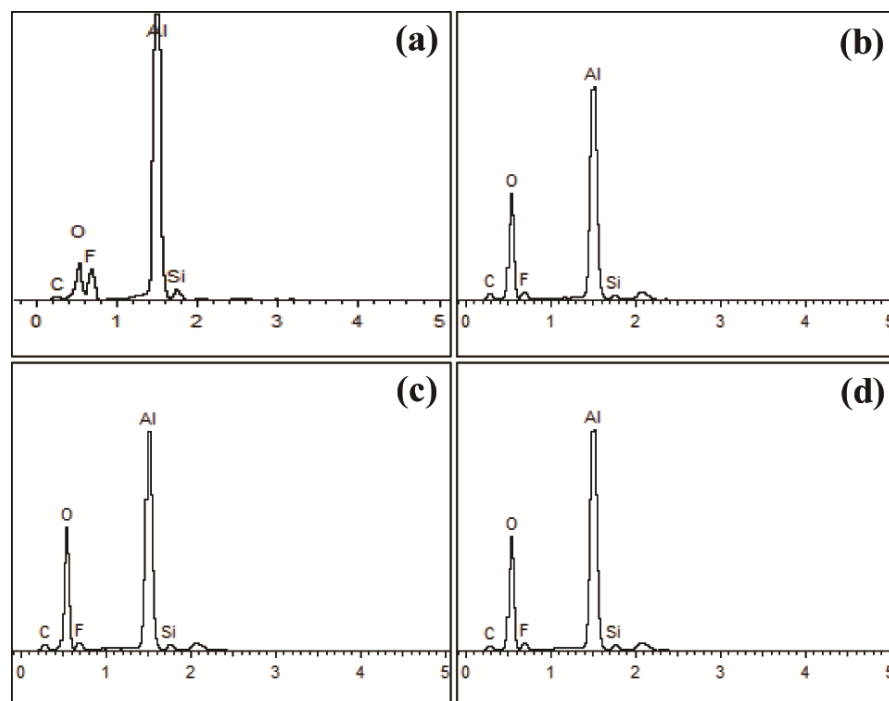

**Fig. S9.** The EDS spectrums of the superamphiphobic H-NW-16 surfaces before (a), and after being peeled by adhesive tape for 10 (b), 20 (c), and 30 (d) times, respectively.

**Table S3**

Atomic concentration of the superamphiphobic H-NW-16 surface before and after the peeling tests

| Treatment/composition (atom%) | C     | O     | F     | Al    | Si   |
|-------------------------------|-------|-------|-------|-------|------|
| As-prepared                   | 12.20 | 44.96 | 10.91 | 29.20 | 2.73 |
| Peeled 10 times               | 11.99 | 45.56 | 10.31 | 29.57 | 2.57 |
| Peeled 20 times               | 10.59 | 50.33 | 8.26  | 29.04 | 1.78 |
| Peeled 30 times               | 9.58  | 52.15 | 6.90  | 30.03 | 1.34 |

**Table S4**

Atomic concentration of the superamphiphobic H-NW-16 surface before and after the abrasion tests

| Treatment/composition (atom%) | C     | O     | F     | Al    | Si   |
|-------------------------------|-------|-------|-------|-------|------|
| As-prepared                   | 11.57 | 44.33 | 11.91 | 29.20 | 2.99 |
| Abraded 10 times              | 10.88 | 45.12 | 10.55 | 30.90 | 2.55 |
| Abraded 20 times              | 10.60 | 48.06 | 9.89  | 29.56 | 1.89 |
| Abraded 30 times              | 6.64  | 56.19 | 5.74  | 30.54 | 0.89 |

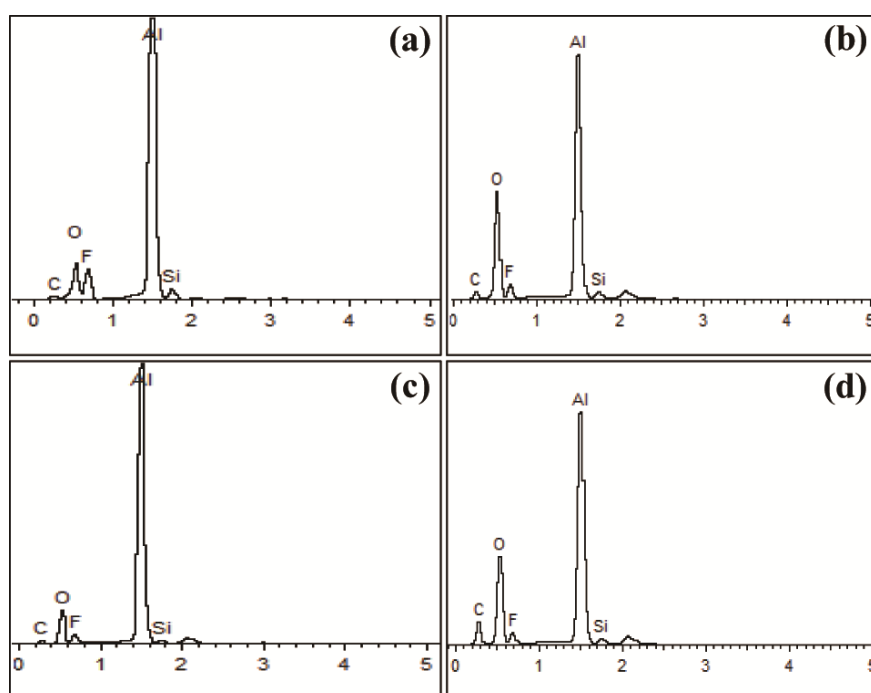**Fig. S10.** The EDS spectrums of the superamphiphobic H-NW-16 surfaces before (a), and after abraded for 10 (b), 20 (c), and 30 (d) times, respectively.

Video S1 recorded the multiple scratching treatments on the superamphiphobic H-NW-16 surface with a sharp blade.

Video S2 recorded the superior non-wetting ability of the superamphiphobic H-NW-16 surface even after scratched for many times.

Video S3 recorded the bendable property of the superamphiphobic H-NW-16 surface.

Video S4 recorded the multiple peeling process of the superamphiphobic H-NW-16 surface.

Video S5 recorded the abrasion process of the superamphiphobic H-NW-16 surface.
